# Supplementary material for: Post-transcriptional modulation of the SigF regulon in Mycobacterium smegmatis by the PhoH2 toxin-antitoxin
Source: PubMed Central journal article supplement (PMC7390352; doi:10.1371/journal.pone.0236551), 2020-07-29
Supplement: pone.0236551.s001.pdf [file pone.0236551.s001.pdf]

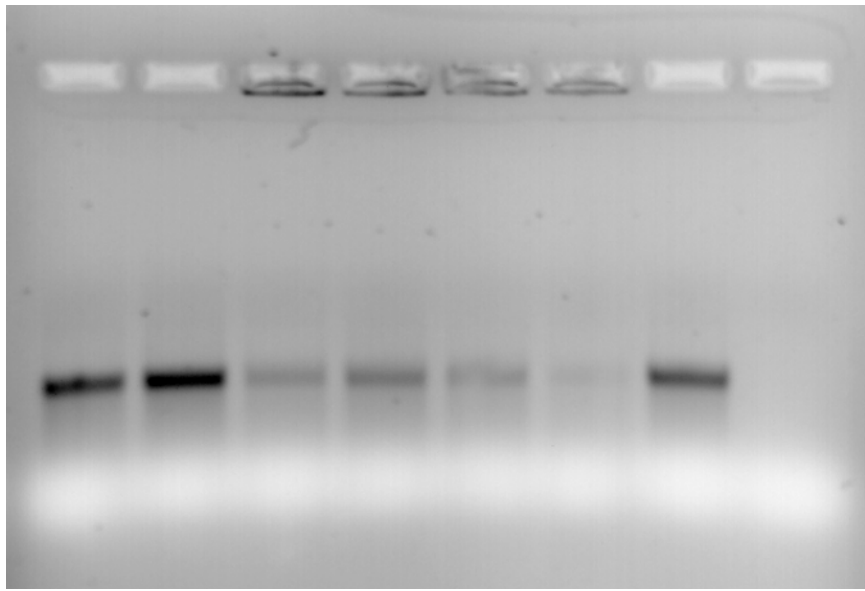

sigF

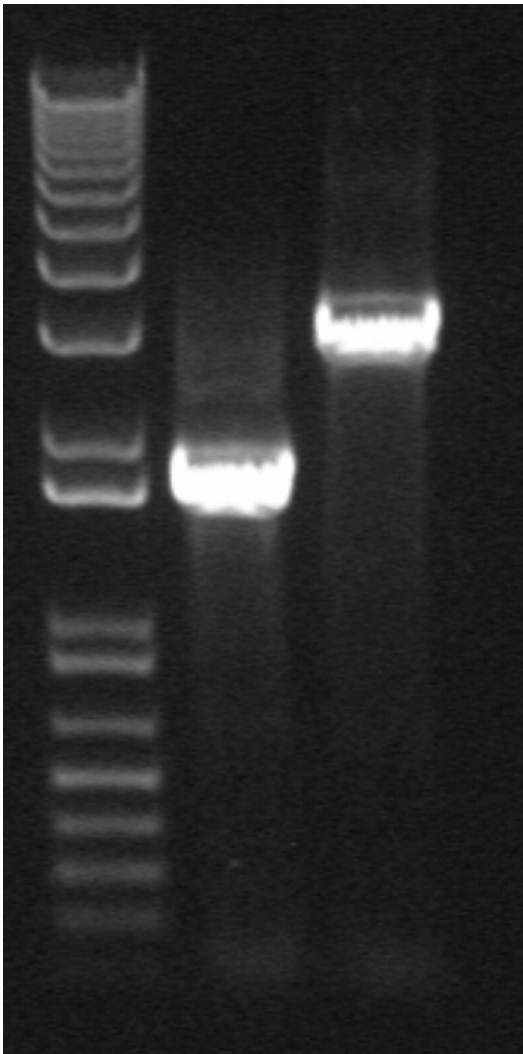

FigS1

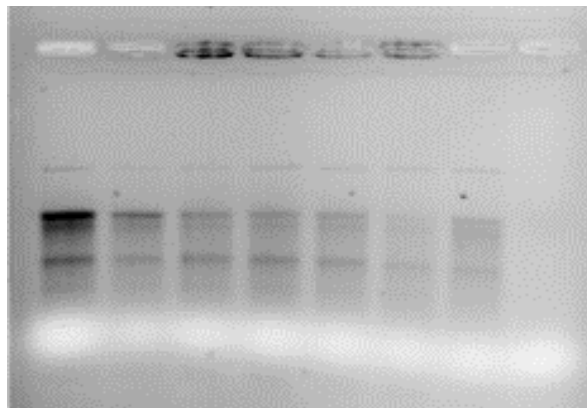

rsbW-sigF

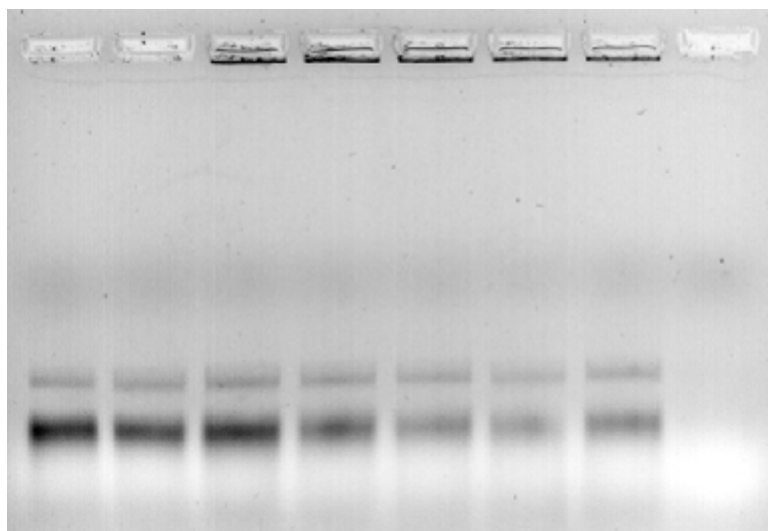

0467
